# Supplementary material for: Sphingoid Bases Regulate the Sigma-1 Receptor—Sphingosine and N,N’-Dimethylsphingosine Are Endogenous Agonists
Source: MDPI journal article supplement (doi:10.3390/ijms24043103), 2023-02-04
Supplement: s1 [file s1]

SUPPLEMENTAL TABLES AND ASSOCIATED DOCKED STRUCTURES

Table S1A.

Sphingosine (SPH) 6DJZ S1R (first docking run).

| Clus-<br>ter<br>Rank | Lowest<br>Binding<br>Energy | Run | Mean<br>Binding<br>Energy | Num<br>in<br>Clus | Histogram |    |    |    |    |    |    |
|----------------------|-----------------------------|-----|---------------------------|-------------------|-----------|----|----|----|----|----|----|
|                      |                             |     |                           |                   | 5         | 10 | 15 | 20 | 25 | 30 | 35 |
| 1                    | -10.15                      | 14  | -8.73                     | 23                | #####     |    |    |    |    |    |    |
| 2                    | -9.29                       | 5   | -9.29                     | 1                 | #         |    |    |    |    |    |    |
| 3                    | -8.70                       | 13  | -8.16                     | 3                 | ###       |    |    |    |    |    |    |
| 4                    | -8.54                       | 17  | -8.51                     | 2                 | ##        |    |    |    |    |    |    |
| 5                    | -8.44                       | 24  | -8.44                     | 1                 | #         |    |    |    |    |    |    |

MODEL 16  
MODEL 14  
USER Run = 14  
USER Cluster Rank = 1  
USER Number of conformations in this cluster = 23  
USER  
USER RMSD from reference structure = 1.900 A  
USER  
USER Estimated Free Energy of Binding = -10.15 kcal/mol [(1)+(2)+(3)-(4)]  
USER Estimated Inhibition Constant, Ki = 36.60 nM (nanomolar) [Temperature = 298.15 K]  
USER  
USER (1) Final Intermolecular Energy = -13.91 kcal/mol  
USER vdW + Hbond + desolv Energy = -10.93 kcal/mol  
USER Electrostatic Energy = -2.98 kcal/mol  
USER (2) Final Total Internal Energy = -2.36 kcal/mol  
USER (3) Torsional Free Energy = +5.37 kcal/mol  
USER (4) Unbound System's Energy = -0.75 kcal/mol  
USER  
USER  
USER  
USER DPF = SPN1\_molA\_6djz\_recep\_min.dpf  
USER NEWDPF move SPH1.pdbqt  
USER NEWDPF about 11.049500 38.264500 -36.382800  
USER NEWDPF tran0 10.282394 36.294722 -37.057911

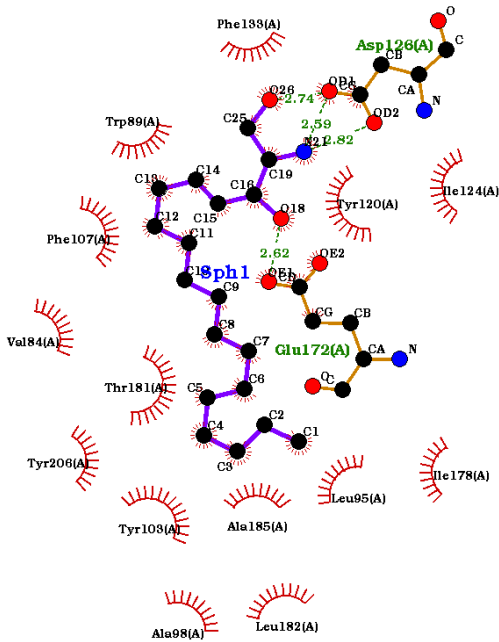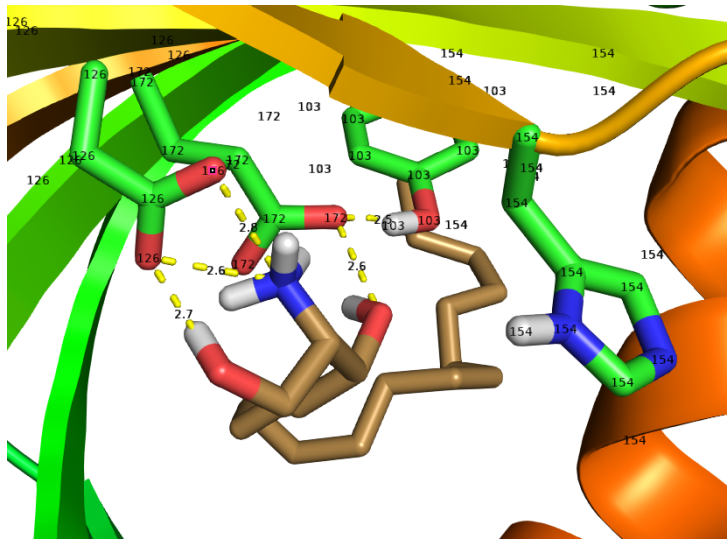

molA-6djz-recep-min\_SPH1\_1

Sphingosine (SPH) 6DJZ S1R (second docking run).

```

MODEL      22
USER      Run = 22
USER      Cluster Rank = 1
USER      Number of conformations in this cluster = 22
USER
USER      RMSD from reference structure          = 1.498 A
USER
USER      Estimated Free Energy of Binding       = -10.11 kcal/mol  [(1)+(2)+(3)-(4)]
USER      Estimated Inhibition Constant, Ki     = 38.68 nM (nanomolar)  [Temperature = 298.15 K]
USER
USER      (1) Final Intermolecular Energy       = -13.28 kcal/mol
USER      vdW + Hbond + desolv Energy           = -10.58 kcal/mol
USER      Electrostatic Energy                  = -2.70 kcal/mol
USER      (2) Final Total Internal Energy       = -2.97 kcal/mol
USER      (3) Torsional Free Energy              = +5.37 kcal/mol
USER      (4) Unbound System's Energy           = -0.76 kcal/mol
USER
USER
USER
USER      DPF = SPN21_molA_6djz_recep_min.dpf
USER      NEWDPF move      SPH21.pdbqt
USER      NEWDPF about     11.871500 37.560000 -35.771600

```

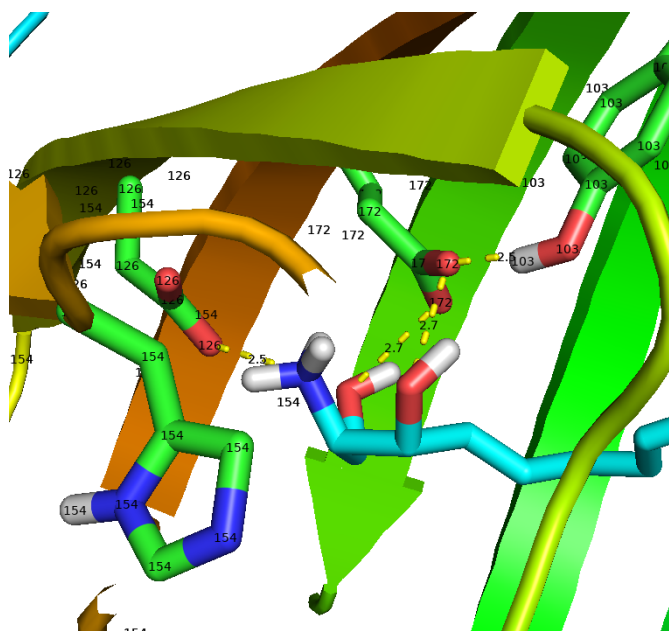

**molA-6djz-recep-min\_SPH21\_1**

Table S2A.

N,N' Dimethylsphingosine (DMS) 6djz S1R (first docking run).

| Clus-ter Rank | Lowest Binding Energy | Run | Mean Binding Energy | Num in Clus | Histogram |    |    |    |    |    |    |
|---------------|-----------------------|-----|---------------------|-------------|-----------|----|----|----|----|----|----|
|               |                       |     |                     |             | 5         | 10 | 15 | 20 | 25 | 30 | 35 |
| 1             | -9.43                 | 16  | -8.56               | 15          | #####     |    |    |    |    |    |    |
| 2             | -9.39                 | 13  | -8.56               | 6           | #####     |    |    |    |    |    |    |
| 3             | -8.46                 | 8   | -8.46               | 1           | #         |    |    |    |    |    |    |
| 4             | -7.98                 | 11  | -7.27               | 7           | #####     |    |    |    |    |    |    |
| 5             | -4.45                 | 18  | -4.45               | 1           | #         |    |    |    |    |    |    |

```
MODEL 16
USER Run = 16
USER Cluster Rank = 1
USER Number of conformations in this cluster = 15
USER
USER RMSD from reference structure = 1.776 A
USER
USER Estimated Free Energy of Binding = -9.43 kcal/mol [(1)+(2)+(3)-(4)]
USER Estimated Inhibition Constant, Ki = 122.41 nM (nanomolar) [Temperature = 298.15 K]
USER
USER (1) Final Intermolecular Energy = -12.31 kcal/mol
USER vdW + Hbond + desolv Energy = -10.44 kcal/mol
USER Electrostatic Energy = -1.87 kcal/mol
USER (2) Final Total Internal Energy = -3.31 kcal/mol
USER (3) Torsional Free Energy = +5.37 kcal/mol
USER (4) Unbound System's Energy = -0.81 kcal/mol
USER
USER
USER DPF = DMS1_molA_6djz_recep_min.dpf
USER NEWDPF move DMS1.pdbqt
USER NEWDPF about 11.259200 37.279700 -35.935300
```

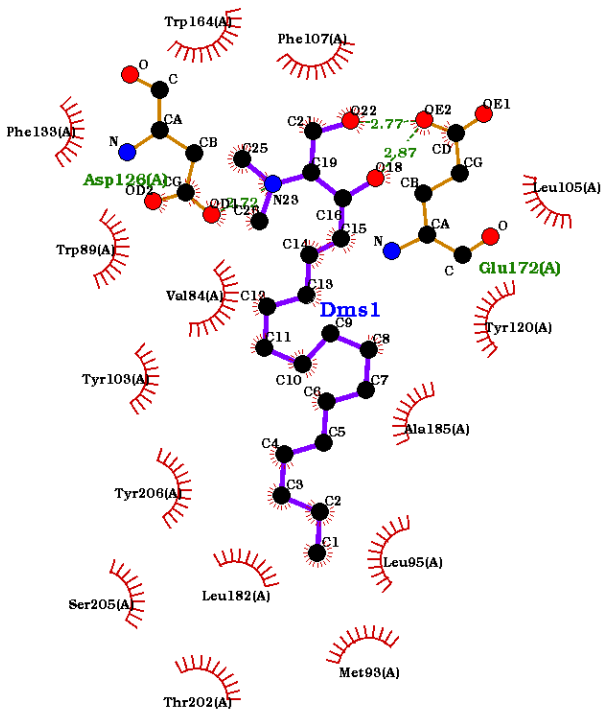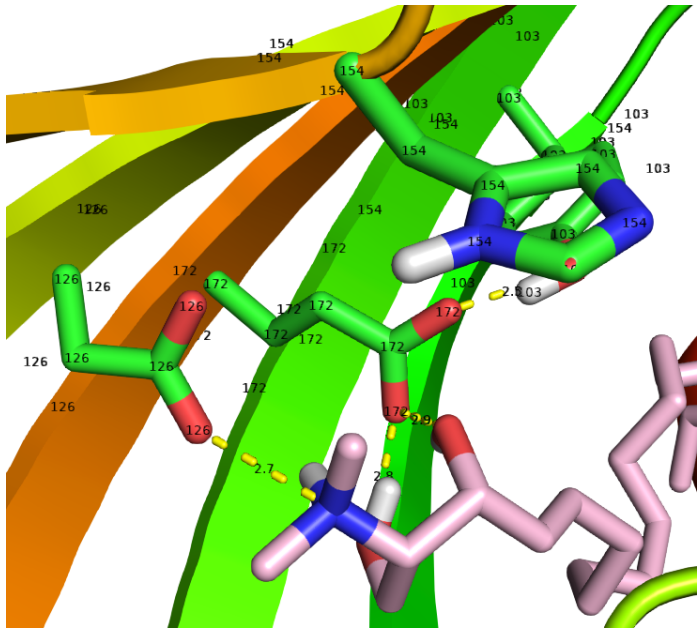

molA-6djz-recep-min\_DMS1\_1

Table S2B.

N,N Dimethylsphingosine (DMS) 6djz S1R (second docking run).

| Clus | Lowest  | Run | Mean    | Num  | Histogram           |
|------|---------|-----|---------|------|---------------------|
| -ter | Binding |     | Binding | in   |                     |
| Rank | Energy  |     | Energy  | Clus | 5 10 15 20 25 30 35 |
| 1    | -9.43   | 14  | -8.15   | 21   | #####               |
| 2    | -8.23   | 27  | -7.97   | 2    | ###                 |
| 3    | -7.81   | 4   | -7.10   | 4    | ####                |
| 4    | -7.39   | 13  | -7.39   | 1    | #                   |
| 5    | -6.88   | 29  | -6.88   | 1    | #                   |
| 6    | -4.69   | 22  | -4.69   | 1    | #                   |

```
MODEL 14
USER Run = 14
USER Cluster Rank = 1
USER Number of conformations in this cluster = 21
USER
USER RMSD from reference structure = 1.756 A
USER
USER Estimated Free Energy of Binding = -9.43 kcal/mol [(1)+(2)+(3)-(4)]
USER Estimated Inhibition Constant, Ki = 122.88 nM (nanomolar) [Temperature = 298.15 K]
USER
USER (1) Final Intermolecular Energy = -13.53 kcal/mol
USER vdW + Hbond + desolv Energy = -11.46 kcal/mol
USER Electrostatic Energy = -2.07 kcal/mol
USER (2) Final Total Internal Energy = -2.07 kcal/mol
USER (3) Torsional Free Energy = +5.37 kcal/mol
USER (4) Unbound System's Energy = -0.81 kcal/mol
USER
USER
USER DPF = DMS2_molA_6djz_recep_min.dpf
USER NEWDPF move DMS2.pdbqt
USER NEWDPF about 11.555000 37.443300 -36.209500
USER NEWDPF tran0 11.567927 34.841621 -36.325919
```

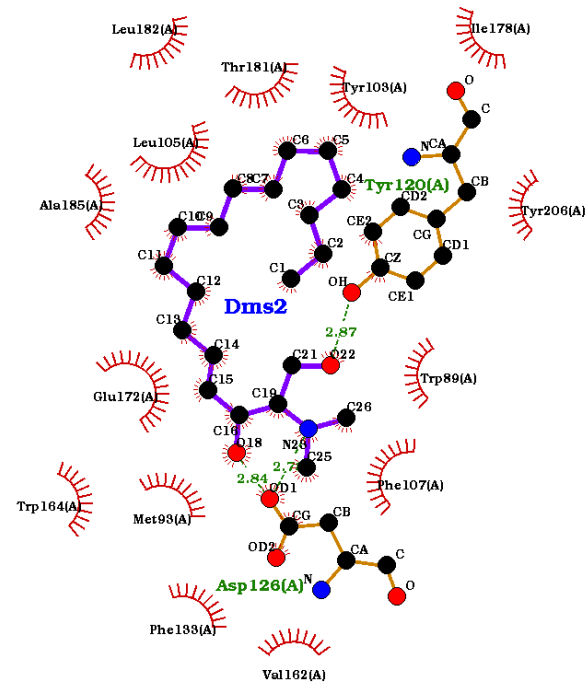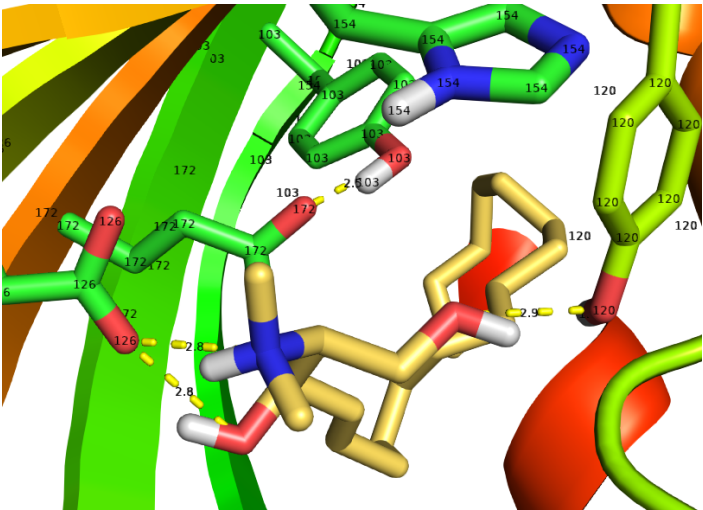

molA-6djz-recep-min\_DMS2\_1

# SUPPLEMENTAL FIGURE-1

**A.**

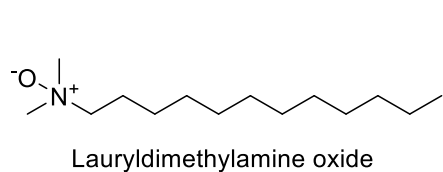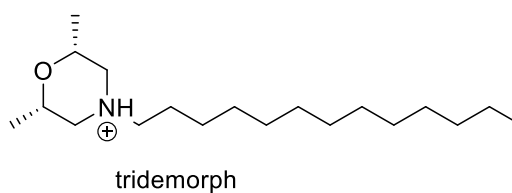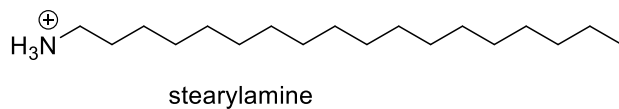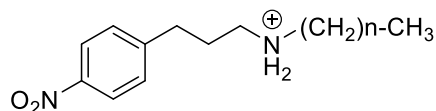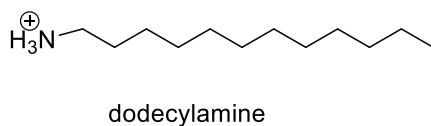

n = 3, N-3-(4-nitrophenylpropyl)tetrane-1-amine

n = 6, N-3-(4-nitrophenylpropyl)heptane-1-amine

n = 11, N-3-(4-nitrophenylpropyl)dodecane-1-amine

n = 17, N-3-(4-nitrophenylpropyl)octadecane-1-amine

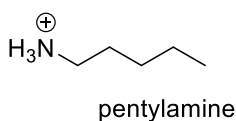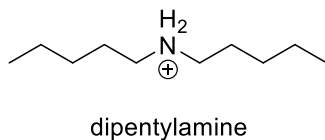

**B.**

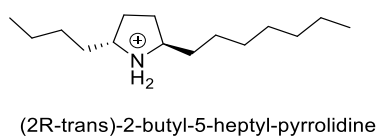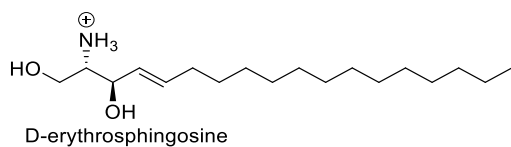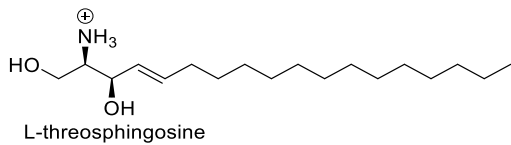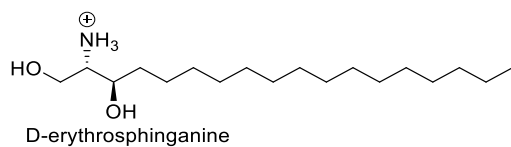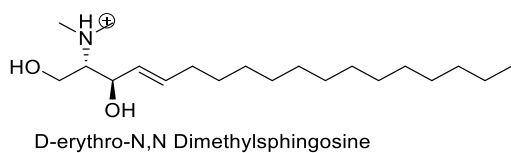

**Figure S1. Exogenous and endogenous amines that bind to the S1R.**

A. Exogenous amines including N-substituted compounds such as lauryldimethylamine oxide (LDAO) [Ramachandran, S., Doctoral Dissertation, UW Madison, 2008], tridemorph [51,110], dodecylamine, stearylamine [51, 55], pentylamine, dipentylamine [51] and similar compounds [52, 53] plus a series of N-3-(4-nitrophenylpropyl)-alkyl-1-amines [51, 54].

B. An endogenous amine and SPH derivatives that bind to the S1R include (2R-trans)-2-butyl-5-heptylpyrrolidine [111], (SPH), L-threosphingosine, D-erythrosphinganine and D-erythro-N,N-dimethylsphingosine (DMS) [55]. With a pKa between 8-9.5 these compounds will generally be positively charged at neutral pH as ammonium salts but the charge will depend on the intracellular environment of the cell and the lipid bilayer.
